# Supplementary material for: A MALT1 inhibitor suppresses human myeloid DC, effector T-cell and B-cell responses and retains Th1/regulatory T-cell homeostasis
Source: PubMed Central journal article supplement (PMC7462277; doi:10.1371/journal.pone.0222548), 2020-09-01

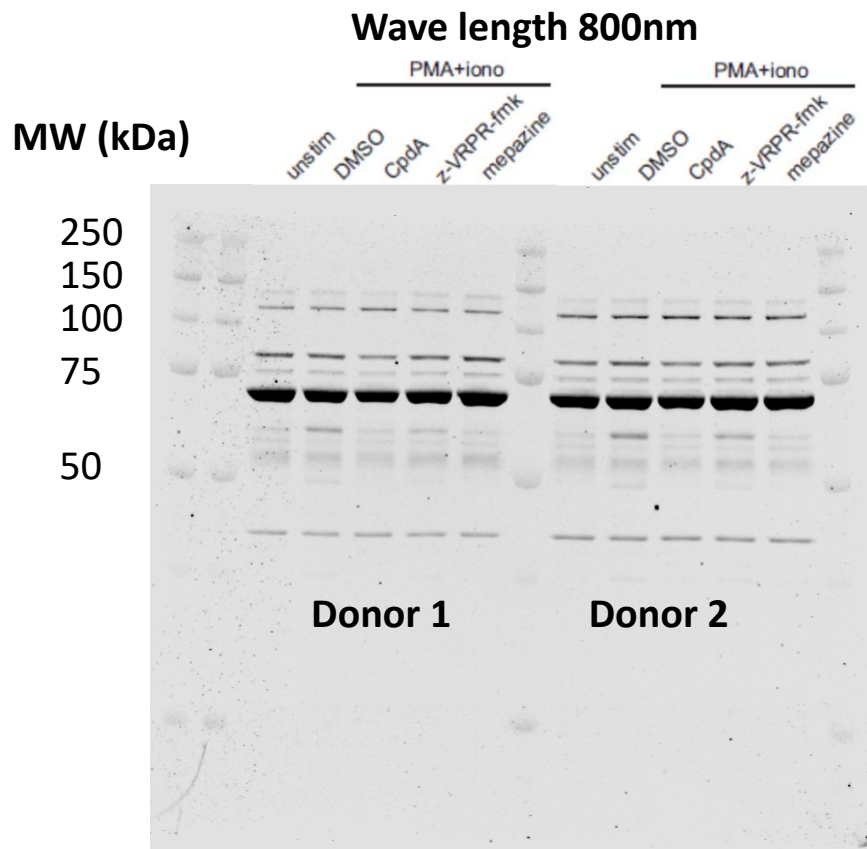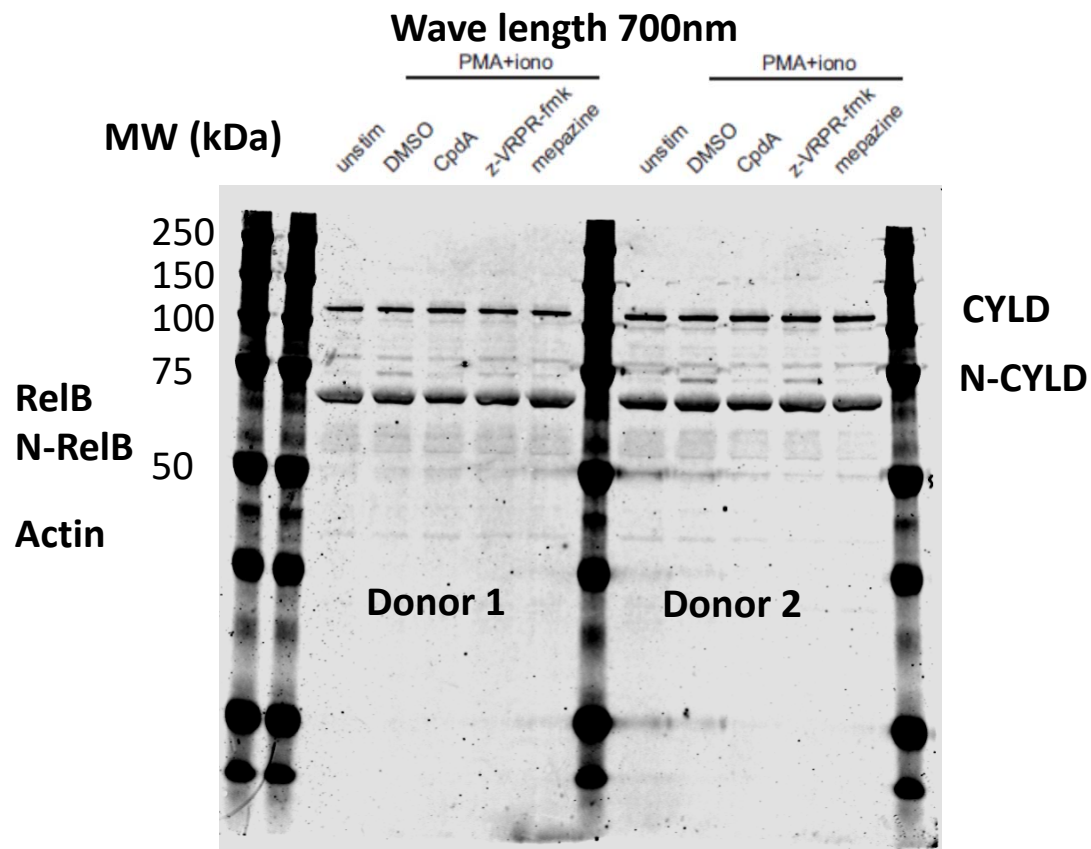

Supplement: pone.0222548.s019.pdf [file pone.0222548.s019.pdf]
